# Supplementary material for: Microfluidic-Enabled Multi-Cell-Densities-Patterning and Culture Device for Characterization of Yeast Strains’ Growth Rates under Mating Pheromone
Source: MDPI journal article supplement (doi:10.3390/chemosensors10040141), 2022-04-08
Supplement: s1 [file s1]

# Microfluidic-Enabled Multi-Cell-Densities-Patterning and Culture Device for Characterization of Yeast Strains' Growth Rates under Mating Pheromone

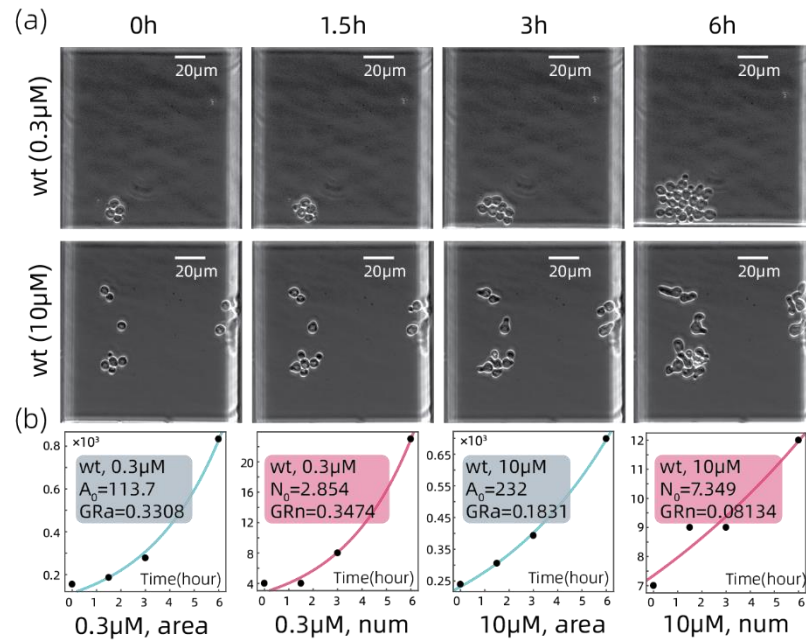

**Figure S1.** Growth rate analyzation on wild type strain in terms of population number and area. (a) Microscopic images from 2 conditions (0.3μM and 10μM). 4 images in each row of (a) were 4 time points (0h, 1.5h, 3h and 6h). (b) Fitting results of populations exhibited in (a) in terms of area and number.

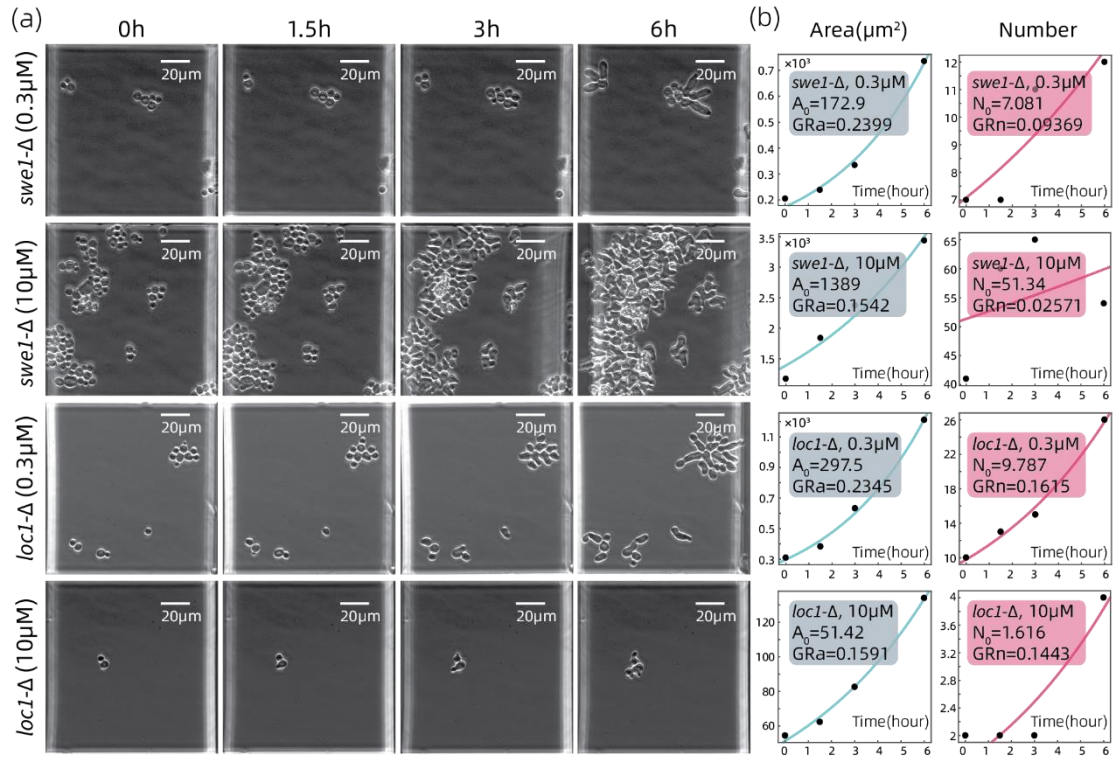

**Figure S2.** Growth rate analyzation on *swe1-Δ* and *loc1-Δ* strains in terms of population area (GRa) and number (GRn). Analyzation pipeline is same as what described for wild type strain. (a) Microfluidic images of the 2 strains from 4 time points (0h, 1.5h, 3h, 6h) under 0.3μM and 10μM. (b) Fitting results corresponding to certain strain under certain condition in (a).

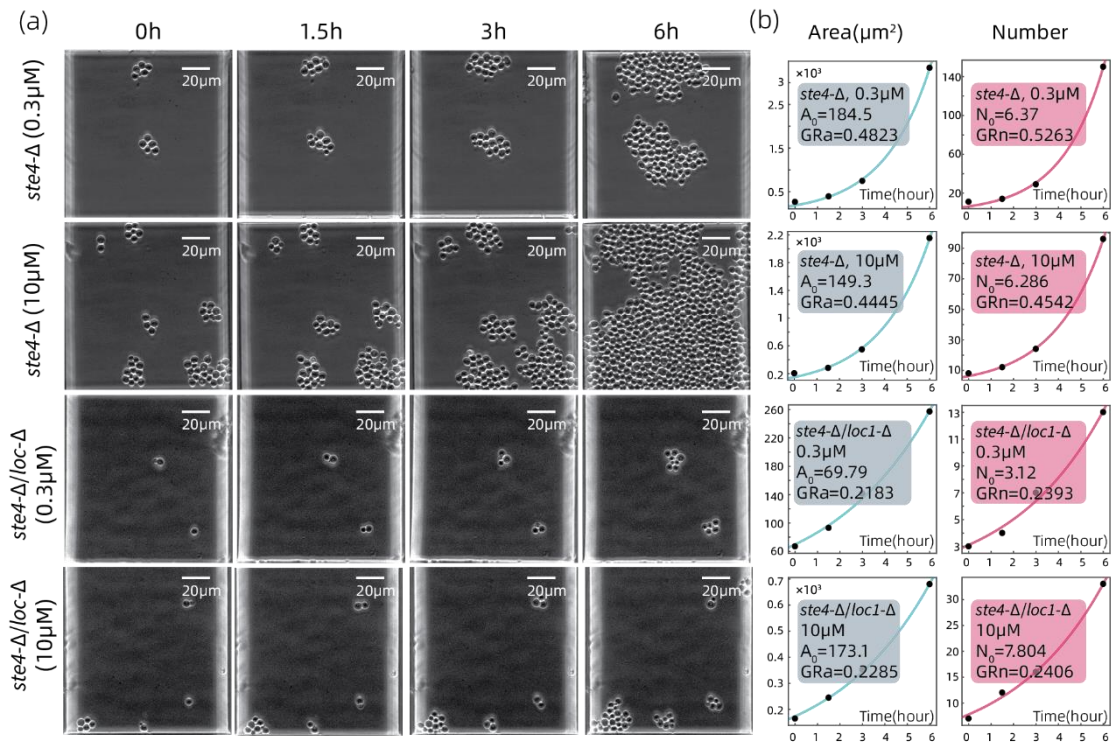

**Figure S3.** Growth rate analyzation on *ste4-Δ* and *ste4-Δ/loc1-Δ* of strains in terms of population area (GRa) and number (GRn). Analyzation pipeline is same as what described for wild type strain. (a) Microfluidic images of the 2 strains from 4 time points (0h, 1.5h, 3h, 6h) under 0.3μM and 10μM. (b) Fitting results corresponding to certain strain under certain condition in (a).
