# Supplementary material for: Microfluidic-Enabled Multi-Cell-Densities-Patterning and Culture Device for Characterization of Yeast Strains’ Growth Rates under Mating Pheromone
Source: MDPI journal article supplement (doi:10.3390/chemosensors10040141), 2022-04-08
Supplement: s1 [file s1]

Archive with 1 entries (1 files):
- chemosensors-1635445-supplementary.pdf
